# Supplementary material
Source: MDPI journal article supplement (https://www.mdpi.com/1996-1073/17/8/1933)
Supplement: s1 [file s1]

**Table S1.** Optimal cluster number of demand response resources.

| Categories of demand response re-<br>sources | Day-ahead re-<br>ducible loads |   |   | Day-ahead tran-<br>sferable loads |   |   | Intraday re-<br>ducible loads |   |   | Real-time directed<br>load controls |    |    |
|----------------------------------------------|--------------------------------|---|---|-----------------------------------|---|---|-------------------------------|---|---|-------------------------------------|----|----|
| Number of the distribution area              | 1                              | 2 | 3 | 1                                 | 2 | 3 | 1                             | 2 | 3 | 1                                   | 2  | 3  |
| Optimal number of clusters                   | 5                              | 5 | 8 | 6                                 | 5 | 6 | 7                             | 7 | 6 | 15                                  | 14 | 14 |

**Table S2.** Clustering results of day-ahead type reducible loads.

| Number of<br>the distribu-<br>tion area | Number of<br>the cluster | Time to enter<br>the distribution<br>network $t_1$ | Time to leave<br>the distributi-<br>on network $t_2$ | The expected<br>response time<br>$t_0$ | Maximum<br>reducible<br>power(kW) | Amount of<br>resources |
|-----------------------------------------|--------------------------|----------------------------------------------------|------------------------------------------------------|----------------------------------------|-----------------------------------|------------------------|
| 1                                       | 1                        | 7:21                                               | 17:06                                                | 10:05                                  | 1.26                              | 16                     |
|                                         | 2                        | 8:42                                               | 17:08                                                | 13:28                                  | 1.23                              | 25                     |
|                                         | 3                        | 10:34                                              | 19:57                                                | 14:52                                  | 1.15                              | 22                     |
|                                         | 4                        | 9:51                                               | 18:52                                                | 13:54                                  | 1.03                              | 18                     |
|                                         | 5                        | 11:05                                              | 21:42                                                | 15:46                                  | 1.57                              | 19                     |
| 2                                       | 1                        | 8:06                                               | 16:42                                                | 13:52                                  | 1.35                              | 27                     |
|                                         | 2                        | 10:37                                              | 18:42                                                | 14:08                                  | 1.04                              | 16                     |
|                                         | 3                        | 15:24                                              | 23:58                                                | 14:37                                  | 1.21                              | 9                      |
|                                         | 4                        | 9:42                                               | 18:44                                                | 15:02                                  | 1.27                              | 23                     |
|                                         | 5                        | 11:38                                              | 20:36                                                | 16:42                                  | 1.08                              | 25                     |
| 3                                       | 1                        | 5:24                                               | 14:37                                                | 9:37                                   | 1.09                              | 14                     |
|                                         | 2                        | 7:38                                               | 15:54                                                | 10:32                                  | 1.52                              | 8                      |
|                                         | 3                        | 10:23                                              | 20:49                                                | 15:02                                  | 1.21                              | 19                     |
|                                         | 4                        | 8:28                                               | 17:43                                                | 16:21                                  | 1.17                              | 15                     |
|                                         | 5                        | 11:29                                              | 20:45                                                | 15:23                                  | 1.22                              | 13                     |
|                                         | 6                        | 9:37                                               | 19:24                                                | 10:14                                  | 1.26                              | 18                     |
|                                         | 7                        | 10:03                                              | 19:02                                                | 15:47                                  | 1.13                              | 6                      |
|                                         | 8                        | 9:47                                               | 18:53                                                | 10:58                                  | 1.38                              | 7                      |

**Table S3.** Clustering results of day-ahead type transferable loads.

| Number of<br>the distribu-<br>tion area | Number<br>of the<br>cluster | Time to enter<br>The distribu-<br>tion network<br>$t_1$ | The durati-<br>on in the<br>distributio-<br>n network<br>$\Delta t$ | Time to<br>leave the<br>distribution<br>network $t_3$ | The ex-<br>pected re-<br>sponse<br>time $t_0$ | Maximum<br>reducible<br>power(kW) | Amount of<br>resources |
|-----------------------------------------|-----------------------------|---------------------------------------------------------|---------------------------------------------------------------------|-------------------------------------------------------|-----------------------------------------------|-----------------------------------|------------------------|
| 1                                       | 1                           | 6:32                                                    | 3:23                                                                | 18:55                                                 | 8:22                                          | 1.73                              | 14                     |
|                                         | 2                           | 8:12                                                    | 3:05                                                                | 20:56                                                 | 9:03                                          | 1.61                              | 17                     |
|                                         | 3                           | 9:45                                                    | 4:22                                                                | 17:22                                                 | 11:10                                         | 1.98                              | 15                     |
|                                         | 4                           | 10:43                                                   | 4:05                                                                | 17:52                                                 | 11:55                                         | 1.77                              | 25                     |
|                                         | 5                           | 17:05                                                   | 3:03                                                                | 23:51                                                 | 18:22                                         | 1.65                              | 16                     |
|                                         | 6                           | 17:51                                                   | 4:56                                                                | 23:58                                                 | 20:00                                         | 1.85                              | 13                     |

|   |   |       |      |       |       |      |    |
|---|---|-------|------|-------|-------|------|----|
| 2 | 1 | 5:22  | 3:19 | 16:37 | 8:22  | 1.92 | 23 |
|   | 2 | 6:38  | 2:55 | 18:25 | 8:03  | 1.78 | 16 |
|   | 3 | 17:08 | 3:35 | 23:55 | 19:32 | 1.56 | 28 |
|   | 4 | 11:45 | 2:59 | 22:52 | 13:18 | 1.88 | 13 |
|   | 5 | 17:38 | 3:01 | 23:58 | 20:03 | 1.69 | 20 |
| 3 | 1 | 18:02 | 3:49 | 24:00 | 21:12 | 1.59 | 13 |
|   | 2 | 5:52  | 3:02 | 17:48 | 8:11  | 1.87 | 17 |
|   | 3 | 10:24 | 2:29 | 21:19 | 12:13 | 1.94 | 20 |
|   | 4 | 16:52 | 3:06 | 23:51 | 18:55 | 1.99 | 28 |
|   | 5 | 17:03 | 4:16 | 23:59 | 21:02 | 1.54 | 14 |
|   | 6 | 17:29 | 3:29 | 23:57 | 19:23 | 1.83 | 8  |

Table S4. Clustering results of intraday type reducible loads.

| Number of the distribution area | Number of the cluster | Time to enter the distribution on network $t_1$ | Time to leave the distribution on network $t_2$ | The expected response time $t_0$ | Maximum reducible power(kW) | Amount of resources |
|---------------------------------|-----------------------|-------------------------------------------------|-------------------------------------------------|----------------------------------|-----------------------------|---------------------|
| 1                               | 1                     | 10:47                                           | 14:32                                           | 13:41                            | 0.88                        | 9                   |
|                                 | 2                     | 11:46                                           | 15:19                                           | 12:07                            | 0.73                        | 18                  |
|                                 | 3                     | 7:13                                            | 10:15                                           | 9:45                             | 0.64                        | 24                  |
|                                 | 4                     | 1:57                                            | 5:16                                            | 3:21                             | 0.92                        | 13                  |
|                                 | 5                     | 16:34                                           | 18:47                                           | 16:44                            | 0.85                        | 16                  |
|                                 | 6                     | 18:48                                           | 22:27                                           | 21:32                            | 0.77                        | 13                  |
|                                 | 7                     | 3:10                                            | 7:55                                            | 6:23                             | 0.69                        | 7                   |
| 2                               | 1                     | 6:12                                            | 10:27                                           | 9:21                             | 0.72                        | 18                  |
|                                 | 2                     | 10:35                                           | 14:33                                           | 11:08                            | 0.83                        | 13                  |
|                                 | 3                     | 13:21                                           | 15:47                                           | 14:17                            | 0.95                        | 7                   |
|                                 | 4                     | 9:14                                            | 13:03                                           | 10:42                            | 0.78                        | 10                  |
|                                 | 5                     | 2:05                                            | 6:48                                            | 5:21                             | 0.67                        | 17                  |
|                                 | 6                     | 19:21                                           | 23:45                                           | 21:21                            | 0.88                        | 10                  |
|                                 | 7                     | 18:08                                           | 21:49                                           | 20:38                            | 0.9                         | 25                  |
| 3                               | 1                     | 4:15                                            | 9:03                                            | 5:15                             | 0.9                         | 15                  |
|                                 | 2                     | 7:25                                            | 12:24                                           | 9:14                             | 0.87                        | 12                  |
|                                 | 3                     | 11:24                                           | 14:32                                           | 14:05                            | 0.84                        | 23                  |
|                                 | 4                     | 16:43                                           | 21:41                                           | 17:01                            | 0.73                        | 20                  |
|                                 | 5                     | 20:05                                           | 23:00                                           | 21:21                            | 0.78                        | 13                  |
|                                 | 6                     | 6:33                                            | 10:03                                           | 10:00                            | 0.8                         | 17                  |

Table S5. Clustering results of real-time type directly controlled loads.

| Number of the distribution area | Number of the cluster | Time to enter the distribution on network $t_1$ | Time to leave the distribution on network $t_2$ | The expected response time $t_0$ | Maximum regulatory power(kW) | Amount of resources |
|---------------------------------|-----------------------|-------------------------------------------------|-------------------------------------------------|----------------------------------|------------------------------|---------------------|
|---------------------------------|-----------------------|-------------------------------------------------|-------------------------------------------------|----------------------------------|------------------------------|---------------------|

|   |    |       |       |       |      |    |
|---|----|-------|-------|-------|------|----|
| 1 | 1  | 11:31 | 13:22 | 12:45 | 0.45 | 5  |
|   | 2  | 15:22 | 17:58 | 16:22 | 0.39 | 6  |
|   | 3  | 2:03  | 4:48  | 3:07  | 0.44 | 5  |
|   | 4  | 5:41  | 7:35  | 6:18  | 0.55 | 8  |
|   | 5  | 20:25 | 22:38 | 21:03 | 0.54 | 4  |
|   | 6  | 7:00  | 9:55  | 8:02  | 0.51 | 6  |
|   | 7  | 16:27 | 18:46 | 17:35 | 0.63 | 7  |
|   | 8  | 21:13 | 23:44 | 21:56 | 0.53 | 6  |
|   | 9  | 6:16  | 8:25  | 7:15  | 0.66 | 5  |
|   | 10 | 6:45  | 8:03  | 7:42  | 0.47 | 6  |
|   | 11 | 5:44  | 7:34  | 6:15  | 0.53 | 14 |
|   | 12 | 9:14  | 11:28 | 10:09 | 0.60 | 8  |
|   | 13 | 10:24 | 12:57 | 10:58 | 0.48 | 5  |
|   | 14 | 6:33  | 7:59  | 7:32  | 0.65 | 4  |
|   | 15 | 5:42  | 7:38  | 7:13  | 0.75 | 11 |
| 2 | 1  | 7:08  | 9:37  | 8:21  | 0.63 | 6  |
|   | 2  | 10:54 | 13:28 | 11:56 | 0.47 | 5  |
|   | 3  | 17:13 | 18:58 | 18:25 | 0.55 | 8  |
|   | 4  | 17:59 | 19:08 | 18:53 | 0.59 | 5  |
|   | 5  | 18:27 | 20:41 | 20:07 | 0.43 | 10 |
|   | 6  | 20:43 | 23:41 | 22:43 | 0.67 | 7  |
|   | 7  | 2:22  | 4:35  | 2:55  | 0.5  | 5  |
|   | 8  | 0:13  | 3:02  | 2:08  | 0.52 | 7  |
|   | 9  | 9:01  | 11:23 | 10:16 | 0.42 | 5  |
|   | 10 | 10:11 | 12:48 | 10:55 | 0.48 | 4  |
|   | 11 | 16:25 | 18:43 | 17:33 | 0.71 | 8  |
|   | 12 | 3:44  | 5:57  | 4:02  | 0.62 | 13 |
|   | 13 | 16:55 | 19:24 | 18:22 | 0.66 | 8  |
|   | 14 | 8:44  | 9:51  | 9:05  | 0.38 | 9  |
| 3 | 1  | 6:14  | 9:11  | 7:36  | 0.48 | 9  |
|   | 2  | 7:15  | 9:57  | 8:34  | 0.57 | 7  |
|   | 3  | 11:27 | 13:48 | 11:56 | 0.62 | 5  |
|   | 4  | 12:32 | 15:13 | 13:42 | 0.54 | 7  |
|   | 5  | 17:38 | 18:58 | 17:58 | 0.43 | 4  |
|   | 6  | 18:29 | 20:34 | 19:53 | 0.68 | 11 |
|   | 7  | 20:46 | 23:39 | 22:19 | 0.6  | 5  |
|   | 8  | 2:12  | 4:53  | 3:01  | 0.4  | 6  |
|   | 9  | 4:23  | 6:55  | 4:56  | 0.56 | 7  |
|   | 10 | 10:13 | 12:49 | 11:34 | 0.67 | 10 |
|   | 11 | 5:44  | 7:15  | 6:27  | 0.44 | 6  |
|   | 12 | 15:55 | 18:43 | 17:22 | 0.58 | 7  |
|   | 13 | 6:11  | 8:38  | 7:06  | 0.7  | 12 |

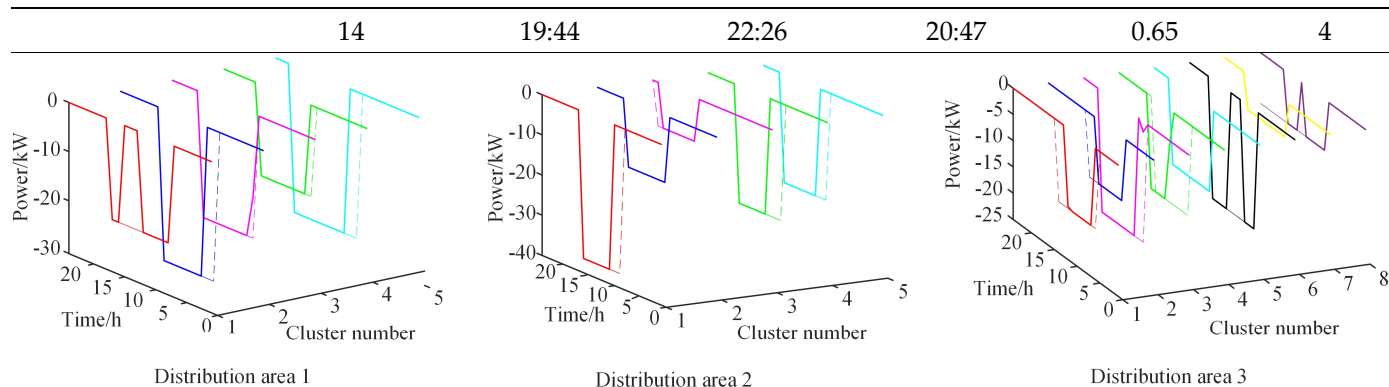

**Figure S1.** Optimal results of day-ahead type reducible loads in the day-ahead stage.

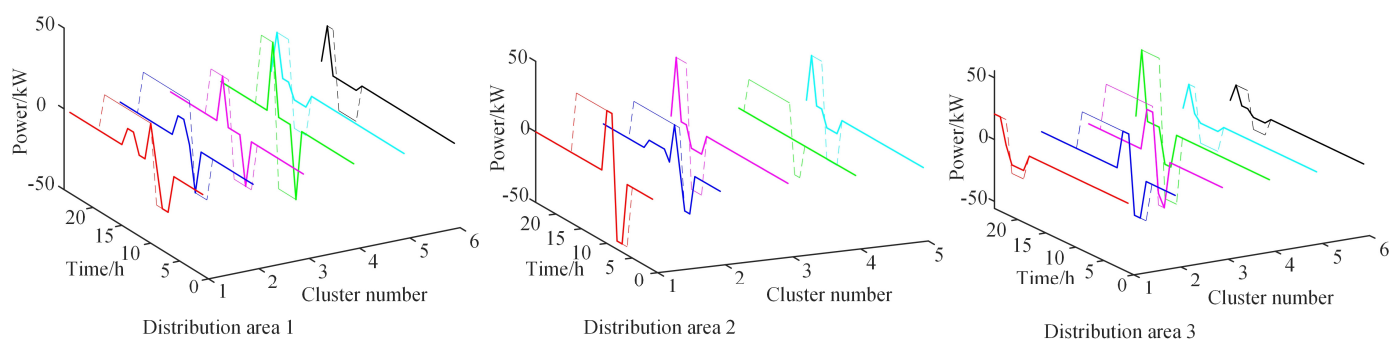

**Figure S2.** Optimal results of day-ahead type transferable loads in the day-ahead stage.

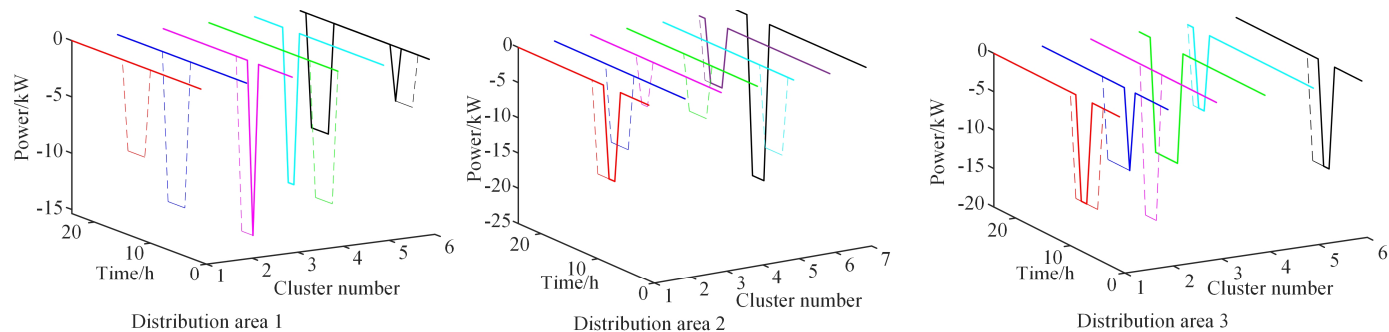

**Figure S3.** Optimal results of intraday type reducible loads in the day-ahead stage.

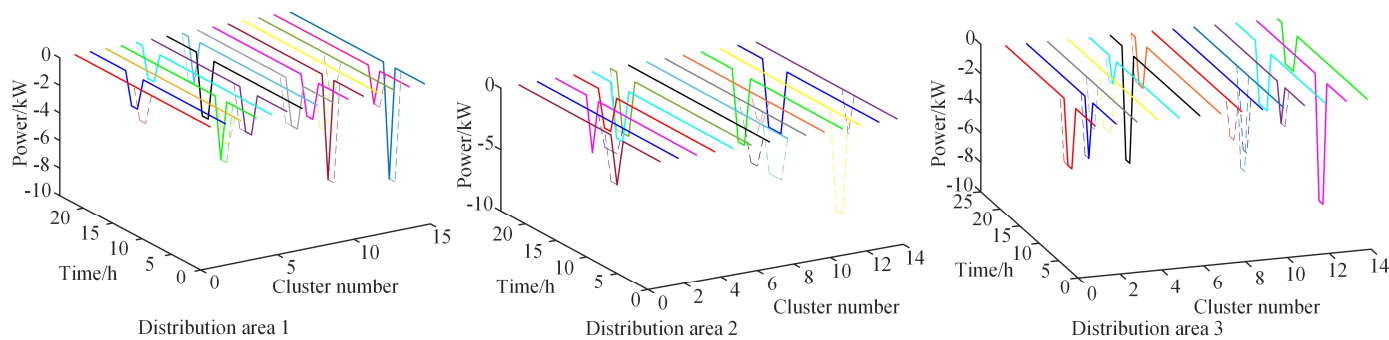

**Figure S4.** Optimal results of real-time type directly controlled load controls in the day-ahead stage.

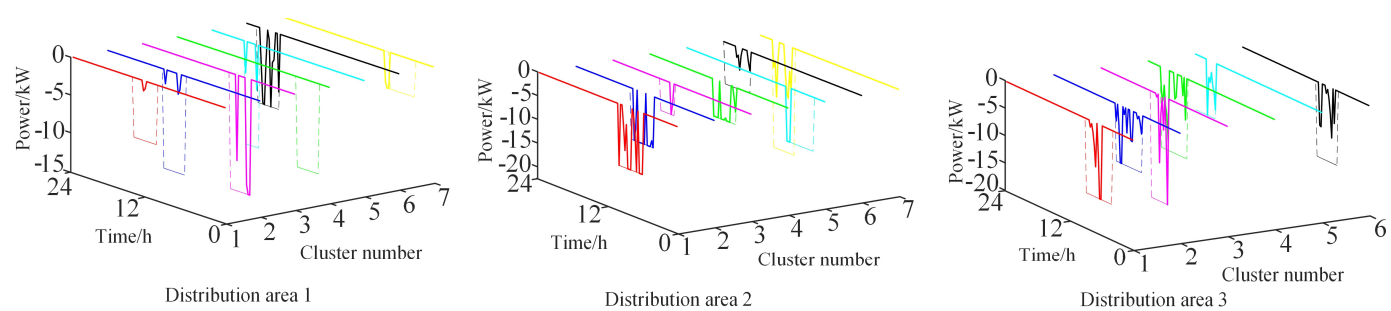

**Figure S5.** Optimal results of intraday type reducible loads in the intraday stage.
